# Supplementary material for: Admission Shock Index Predicts Short-Term, All-Cause In-Hospital Mortality in Patients with Acute Aortic Dissection and Intramural Hematoma
Source: Research Square preprint supplement (doi:10.21203/rs.3.rs-1313759/v1), 2022-02-03
Supplement: Supplementary file 3 [file 137cff45dbe1217af2d0d5b3.docx]

| Supplement Table 2：**Subgroup analysis of SI associated with the in-hospital mortality in AD and IMH patients.** | | | | | |
| --- | --- | --- | --- | --- | --- |
| Subgroup | Variable | Surviving  n (%) | Non-surviving  n (%) | HR (95%CI) d | P-value |
| Stanford A | SI<0.7 | 356 (79.5) | 92 (20.5) |  |  |
|  | SI≥0.7 | 69 (65.7) | 36 (34.3) a ** | 1.869 (1.271-2.749) | 0.001 |
| Surgery | SI<0.7 | 193 (92.8) | 15 (7.2) |  |  |
|  | SI≥0.7 | 41 (89.1) | 5 (10.9) b | 1.655 (0.601-4.556) | 0.329 |
| Non-surgery | SI<0.7 | 163 (67.9) | 77 (32.1) |  |  |
|  | SI≥0.7 | 28 (47.5) | 31 (52.5) a ** | 2.027 (1.330-3.089) | 0.001 |
| Stanford B | SI<0.7 | 608 (96.4) | 23 (3.6) |  |  |
|  | SI≥0.7 | 56 (84.8) | 10 (15.2) b ** | 4.384 (2.085-9.218) | <0.001 |
| TEVAR | SI<0.7 | 199 (97.1) | 6 (2.9) |  |  |
|  | SI≥0.7 | 19 (95.0) | 1 (5.0) c | 1.812 (0.218-15.070) | 0.582 |
| Non-TEVAR | SI<0.7 | 409 (96.0) | 17 (4.0) |  |  |
|  | SI≥0.7 | 37 (80.4) | 9 (19.6) b *** | 5.118 (2.277-11.504) | <0.001 |

Values are based on the χ2-test or univariate Cox proportional hazards model. Results are shown as the HR (95% CI), and statistical significance is indicated when the 95% CI does not contain 1. a Pearson Chi-square test, b continuity correction test; c Fisher’s exact test; d univariate Cox proportional hazards model. *P<0.05, **p<0.01, ***p<0.001.

**Abbreviations:** AD, aortic dissection; IMH, intramural hematoma; CI, confidence interval; HR, hazard ratio; SI, shock index; TEVAR, thoracic endovascular aortic repair.
