# Supplementary material for: Admission Shock Index Predicts Short-Term, All-Cause In-Hospital Mortality in Patients with Acute Aortic Dissection and Intramural Hematoma
Source: Research Square preprint supplement (doi:10.21203/rs.3.rs-1313759/v1), 2022-02-03
Supplement: Supplementary file 4 [file 5f785223ea61254e348a7d62.docx]

| Supplemental Table 1: **Univariate analysis of 30-day, all-cause in-hospital mortality in acute AD and IMH patients.** | | | |
| --- | --- | --- | --- |
| Independent variable | Stanford A |  | Stanford B |
| HR (95%CI) |  | HR (95%CI) |
| SI | 3.941 (2.350-6.612) *** |  | 42.213 (8.172-218.052) *** |
| Age | 1.020 (1.005-1.035) * |  | 1.015 (0.987-1.044) |
| Female | 1.303 (0.903-1.881) |  | 0.771 (0.298-1.997) |
| Hypertension | 1.061 (0.701-1.605) |  | 1.575 (0.553-4.483) |
| Diabetes | 0.522 (0.213-1.277) |  | 0.872 (0.266-2.856) |
| Smoker | 1.047 (0.735-1.493) |  | 0.895 (0.440-1.819) |
| IMH | 0.343 (0.185-0.636) ** |  | 0.396 (0.172-0.914) * |
| Surgery | 0.124 (0.076-0.204) *** |  |  |
| TEVAR |  |  | 0.445 (0.191-1.037) |
| Cr | 1.002 (1.001-1.003) *** |  | 1.001 (1.000-1.002) * |
| HGB | 1.004 (0.993-1.015) |  | 0.978 (0.965-0.992) ** |
| UA | 1.003 (1.002-1.004) *** |  | 1.003 (1.001-1.005) ** |
| LDL | 0.726 (0.541-0.974) * |  | 0.864 (0.490-1.524) |

Values are based on univariate Cox proportional hazards models. Results are shown as HR (95% CI). *P<0.05, **p<0.01, ***p<0.001.

**Abbreviations:** AD, aortic dissection; IMH, intramural hematoma; CI, confidence interval; Cr, serum creatinine; HGB, hemoglobin; IMH, intramural hematoma; LDL, lower-density lipoprotein; SI, shock index; TEVAR, thoracic endovascular aortic repair; UA, uric acid.
